# Supplementary material
Source: Springer Nature journal article supplement (https://www.springermedizin.de/resource/supplementary/12921_2005_18_MOESM3_ESM.pdf/9457302)

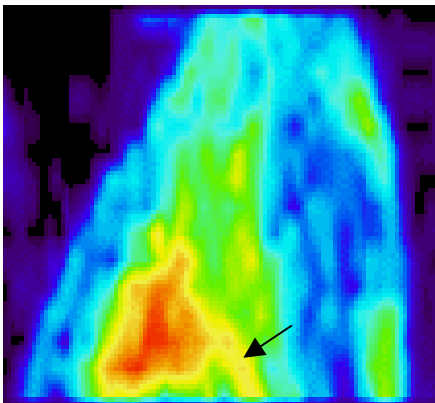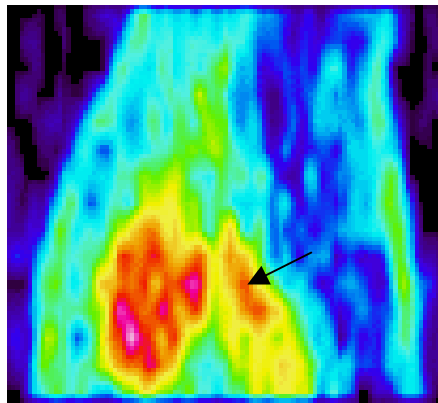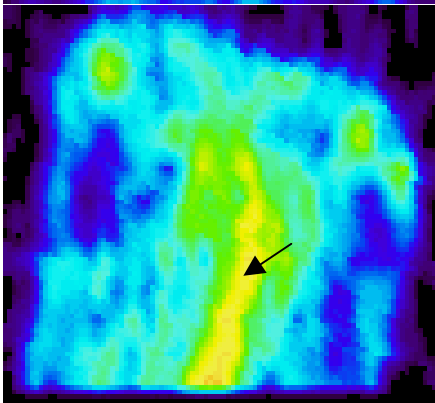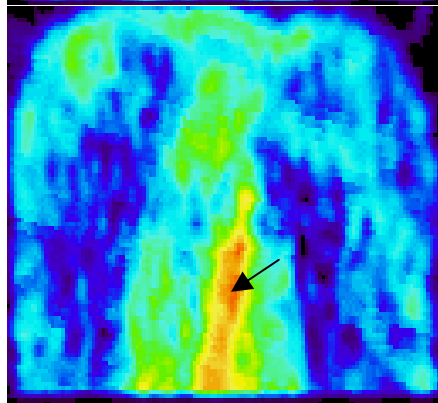

**A**

**B**

Supplement: MOESM3 [file 9457302]
